# Supplementary material
Source: PubMed Central journal article supplement (PMC3854893)
Supplement: SD3.pdf [file SD3.pdf]

SUPPLEMENTAL APPENDIX TABLE A.1  
Mean/median cost per provider visited during the health-seeking phase prior to admission (US\$ 2010)

|                       | Bazora |      |      |        |      |       | Kassab |      |       |        |      |      | Total |      |       |        |      |       |
|-----------------------|--------|------|------|--------|------|-------|--------|------|-------|--------|------|------|-------|------|-------|--------|------|-------|
|                       | n      | Mean | SD   | Median | p25  | p75   | n      | Mean | SD    | Median | p25  | p75  | n     | Mean | SD    | Median | p25  | p75   |
| Traditional healer    | 0      |      |      |        |      |       | 3      | 10.2 | 9.2   | 10.2   | 3.7  | 16.7 | 3     | 10.2 | 9.2   | 10.2   | 3.7  | 16.7  |
| Chemist               | 1      | 5.6  |      | 5.6    | 5.6  | 5.6   | 1      | 11.9 |       | 11.9   | 11.9 | 11.9 | 2     | 8.7  | 4.5   | 8.7    | 5.6  | 11.9  |
| VHW                   | 16     | 20.2 | 28.9 | 11.2   | 7.8  | 20.8  | 21     | 10.4 | 6.7   | 9.1    | 4.3  | 14.0 | 37    | 14.6 | 19.8  | 9.3    | 4.5  | 16.0  |
| Public health center  | 6      | 54.2 | 73.2 | 27.3   | 12.3 | 47.3  | 16     | 24.4 | 23.9  | 12.8   | 9.3  | 38.3 | 22    | 33.3 | 44.7  | 15.3   | 10.0 | 42.8  |
| Public hospital       | 8      | 36.0 | 50.5 | 13.9   | 10.1 | 40.9  | 22     | 65.5 | 81.3  | 29.0   | 13.8 | 99.5 | 30    | 56.8 | 73.8  | 24.2   | 12.1 | 55.8  |
| Private doctor        | 4      | 73.7 | 59.3 | 93.0   | 7.1  | 120.9 | 22     | 94.6 | 137.7 | 47.3   | 35.7 | 89.7 | 26    | 90.7 | 125.4 | 51.2   | 32.7 | 101.2 |
| Private laboratory    | 0      |      |      |        |      |       | 13     | 27.9 | 16.8  | 26.0   | 17.9 | 34.2 | 13    | 27.9 | 16.8  | 26.0   | 17.9 | 34.2  |
| Total cost per person | 30     | 38.1 | 54.7 | 15.9   | 4.5  | 40.9  | 45     | 76.0 | 124.3 | 43.2   | 21.2 | 80.7 | 75    | 60.8 | 103.5 | 33.1   | 9.3  | 73.3  |

SUPPLEMENTAL APPENDIX TABLE A.2  
Mean/median direct costs of VL care during the health seeking phase (US\$ 2010)

|                                       | Bazora      |             |             |            |             | Kassab      |             |             |             |             | Total       |             |             |            |             |
|---------------------------------------|-------------|-------------|-------------|------------|-------------|-------------|-------------|-------------|-------------|-------------|-------------|-------------|-------------|------------|-------------|
|                                       | Mean        | SD          | Median      | p25        | p75         | Mean        | SD          | Median      | p25         | p75         | Mean        | SD          | Median      | p25        | p75         |
| Direct medical costs                  |             |             |             |            |             |             |             |             |             |             |             |             |             |            |             |
| Consultation                          | 4.2         | 11.3        | 0.0         | 0.0        | 2.2         | 8.2         | 13.9        | 2.2         | 0.0         | 7.4         | 6.6         | 13.0        | 1.1         | 0.0        | 6.0         |
| Ancillary drugs                       | 16.9        | 17.5        | 11.2        | 3.7        | 26.0        | 32.1        | 59.4        | 18.2        | 8.2         | 38.0        | 26.0        | 47.7        | 13.8        | 6.7        | 37.2        |
| Laboratory investigations             | 5.2         | 9.2         | 0.6         | 0.0        | 8.6         | 18.6        | 30.2        | 7.4         | 1.1         | 24.2        | 13.2        | 24.9        | 3.3         | 0.0        | 16.7        |
| <i>Total direct medical costs</i>     | <i>26.3</i> | <i>31.2</i> | <i>13.4</i> | <i>4.5</i> | <i>40.9</i> | <i>58.9</i> | <i>96.2</i> | <i>35.7</i> | <i>21.2</i> | <i>65.7</i> | <i>45.9</i> | <i>78.4</i> | <i>24.2</i> | <i>9.3</i> | <i>54.0</i> |
| Direct non-medical costs              |             |             |             |            |             |             |             |             |             |             |             |             |             |            |             |
| Transportation                        | 7.6         | 19.3        | 0.0         | 0.0        | 4.5         | 7.3         | 10.9        | 2.2         | 0.0         | 10.4        | 7.5         | 14.7        | 1.1         | 0.0        | 7.4         |
| Food                                  | 3.1         | 7.6         | 0.0         | 0.0        | 0.0         | 8.7         | 24.8        | 0.9         | 0.0         | 5.2         | 6.5         | 19.9        | 0.0         | 0.0        | 4.8         |
| Other                                 | 1.1         | 5.2         | 0.0         | 0.0        | 0.2         | 1.0         | 3.8         | 0.0         | 0.0         | 0.2         | 1.0         | 4.4         | 0.0         | 0.0        | 0.2         |
| <i>Total direct non-medical costs</i> | <i>11.9</i> | <i>26.9</i> | <i>0.0</i>  | <i>0.0</i> | <i>5.6</i>  | <i>17.1</i> | <i>33.7</i> | <i>4.7</i>  | <i>0.0</i>  | <i>21.6</i> | <i>15.0</i> | <i>31.1</i> | <i>2.6</i>  | <i>0.0</i> | <i>18.6</i> |
| Total direct costs                    | 38.1        | 54.7        | 15.9        | 4.5        | 40.9        | 76.0        | 124.3       | 43.2        | 21.2        | 80.7        | 60.8        | 103.5       | 33.1        | 9.3        | 73.3        |

SUPPLEMENTAL APPENDIX TABLE A.3  
Mean/median direct costs of visceral leishmaniasis (VL) care at the treatment facility (US\$ 2010)

|                                       | Bazora       |             |              |              |              | Kassab       |             |              |              |              | Total        |             |              |              |              |
|---------------------------------------|--------------|-------------|--------------|--------------|--------------|--------------|-------------|--------------|--------------|--------------|--------------|-------------|--------------|--------------|--------------|
|                                       | Mean         | SD          | Median       | p25          | p75          | Mean         | SD          | Median       | p25          | p75          | Mean         | SD          | Median       | p25          | p75          |
| Direct medical costs                  |              |             |              |              |              |              |             |              |              |              |              |             |              |              |              |
| Consultation                          | 1.7          | 1.3         | 1.1          | 1.1          | 2.2          | 4.5          | 0.9         | 4.8          | 4.8          | 4.8          | 3.3          | 1.7         | 3.7          | 1.1          | 4.8          |
| Ancillary drugs                       | 18.0         | 11.5        | 16.4         | 11.2         | 22.3         | 6.5          | 5.1         | 5.6          | 2.6          | 7.4          | 11.1         | 10.0        | 7.4          | 4.3          | 15.6         |
| Laboratory investigations             | 8.3          | 9.6         | 4.8          | 3.3          | 9.7          | 1.3          | 1.5         | 0.7          | 0.0          | 1.7          | 4.1          | 7.0         | 1.9          | 0.2          | 4.1          |
| <i>Total direct medical costs</i>     | <i>28.0</i>  | <i>18.9</i> | <i>23.3</i>  | <i>18.6</i>  | <i>29.0</i>  | <i>12.3</i>  | <i>6.0</i>  | <i>11.5</i>  | <i>7.8</i>   | <i>14.0</i>  | <i>18.5</i>  | <i>14.9</i> | <i>14.0</i>  | <i>9.9</i>   | <i>22.3</i>  |
| Direct non-medical costs              |              |             |              |              |              |              |             |              |              |              |              |             |              |              |              |
| Transportation                        | 7.4          | 11.3        | 3.7          | 0.7          | 7.4          | 5.9          | 9.3         | 1.9          | 0.7          | 8.9          | 6.5          | 10.1        | 2.6          | 0.7          | 8.9          |
| Food                                  | 116.0        | 50.3        | 111.6        | 111.6        | 141.4        | 125.2        | 40.3        | 111.6        | 111.6        | 137.7        | 121.5        | 44.5        | 111.6        | 111.6        | 141.4        |
| Other                                 | 5.3          | 4.2         | 4.9          | 3.5          | 6.1          | 4.8          | 4.1         | 3.7          | 1.9          | 6.9          | 5.0          | 4.1         | 4.5          | 2.0          | 6.9          |
| <i>Total direct non-medical costs</i> | <i>128.7</i> | <i>50.5</i> | <i>121.1</i> | <i>112.4</i> | <i>155.5</i> | <i>135.8</i> | <i>43.0</i> | <i>128.0</i> | <i>114.4</i> | <i>158.9</i> | <i>133.0</i> | <i>46.0</i> | <i>126.5</i> | <i>113.9</i> | <i>157.8</i> |
| Total direct costs                    | 156.6        | 56.6        | 149.4        | 136.2        | 184.2        | 148.1        | 43.8        | 148.5        | 124.8        | 172.5        | 151.5        | 49.1        | 148.5        | 128.2        | 184.2        |
